# Supplementary material for: Identification of SNPs and Candidate Genes Associated With Salt Tolerance at the Seedling Stage in Cotton (Gossypium hirsutum L.)
Source: Front Plant Sci. 2018 Jul 11;9:1011. doi: 10.3389/fpls.2018.01011 (PMC6050395; doi:10.3389/fpls.2018.01011)
Supplement: Supplementary file 5 [file Table_5.XLSX]

## Sheet: Table S5
Table S5. Annotation and expression of 26 candidate genes on Chromosome D10
Number	Gene ID	Anotation	FPKM of Salt_01h	FPKM of Salt_03h	FPKM of Salt_06h	FPKM of Salt_12h
1	Gh_D10G1869	ARR17, RR17 | response regulator 17	0	0.913061	0	0
2	Gh_D10G1870	TLC ATP/ADP transporter	2.53607	3.41313	4.06868	5.40532
3	Gh_D10G1871	ATAZG1, AZG1 | AZA-guanine resistant1	9.89481	11.1271	5.15035	3.73386
4	Gh_D10G1872	5-FCL | 5-formyltetrahydrofolate cycloligase	6.96681	8.29212	9.27341	7.47907
5	Gh_D10G1873	RmlC-like cupins superfamily protein	2.12152	1.86847	0	0
6	Gh_D10G1874	CIPK10, PKS2, SIP1, SNRK3.8 | SOS3-interacting protein 1	0.74831	2.35794	0	0.0743269
7	Gh_D10G1875	Plant protein of unknown function (DUF827)	4.19966	5.94978	3.21204	1.59206
8	Gh_D10G1876	unknown protein	0	0.380893	0	0
9	Gh_D10G1877	RING/FYVE/PHD zinc finger superfamily protein	0.756962	0.447837	1.61964	2.03557
10	Gh_D10G1878	Major facilitator superfamily protein	21.1096	19.9389	10.8544	3.04308
11	Gh_D10G1879	TYRDC, TYRDC1 | L-tyrosine decarboxylase	0	0	0	0
12	Gh_D10G1880	Peroxidase superfamily protein	0	0.270069	0	0
13	Gh_D10G1881	Peroxidase superfamily protein	0	0.140217	0	0
14	Gh_D10G1882	Peroxidase superfamily protein	18.878	15.3652	16.8257	17.3675
15	Gh_D10G1883	unknown protein	0	0	0	0
16	Gh_D10G1884	ATGSTF8, ATGSTF5, GST6, GSTF8 | glutathione S-transferase phi 8	0	0	0	0
17	Gh_D10G1885	unknown protein	0	0	0	0
18	Gh_D10G1886	unknown protein	0	0	0	0.463821
19	Gh_D10G1887	unknown protein	0	0	0	0
20	Gh_D10G1888	SINAT2 | seven in absentia of Arabidopsis 2	2.97461	4.40611	5.31824	5.53243
21	Gh_D10G1889	unknown protein	0	0	0	0
22	Gh_D10G1890	TBR | Plant protein of unknown function (DUF828)	3.04384	2.98997	5.74921	4.35425
23	Gh_D10G1891	unknown protein	0	0	0	0
24	Gh_D10G1892	Armadillo/beta-catenin-like repeat family protein	4.37904	2.09137	3.96198	3.70034
25	Gh_D10G1893	RFO1, WAKL22 | Wall-associated kinase family protein	0	0.262147	0	0.0447586
26	Gh_D10G1894	ANNAT8 | annexin 8	0	0	0	0
