# Supplementary material for: Identification of SNPs and Candidate Genes Associated With Salt Tolerance at the Seedling Stage in Cotton (Gossypium hirsutum L.)
Source: Front Plant Sci. 2018 Jul 11;9:1011. doi: 10.3389/fpls.2018.01011 (PMC6050395; doi:10.3389/fpls.2018.01011)
Supplement: Supplementary file 7 [file Table_7.XLSX]

## Sheet: Table S7
Table S7. List of primers for RT-PCR
Number	Gene ID	Primer sequences
1	SINAT1F	GTCAAATCCAATCCCCACG
	SINAT1R	CTTGCCACATAAACTTCCTGCT
2	CIPK1F	TATAAGACCGGCTTTGAGTGACA
	CIPK1R	AATGGTTGCGACTCGTGATGT
3	NAC1F	CGTGGAGCAATGGTTTTACTTTAC
	NAC1R	GACGAGTAGACAAAGCCGGGA
4	UPL1F	ATAGCGGGGATACCGTTGGA
	UPL1R	CCTGAATACAAGCAAATGAGAGCA
5	YLS1F	TGAATGCTGGGATGGTGCTG
	YLS1R	TAGTTGGACCGGTAAAGGAAATATG
6	CPK1F	CAATGAGTTTGTGGCGATGATG
	CPK1R	CCTGCGTCGGTGCGTATGT
7	GhUBQ14-F	CAACGCTCCATCTTGTCCTT
	GhUBQ14-R	TGATCGTCTTTCCCGTAAGC
